# Supplementary material for: A graphene oxide–rhodamine 6G nanocomposite as turn-on fluorescence probe for selective detection of DNA
Source: Royal Society of Chemistry journal article supplement (doi:10.1039/c2ay05827h), 2012-01-01
Supplement: c2ay05827h.pdf [file c2ay05827h.pdf]

# Supporting information for

## A Graphene Oxide–Rhodamine 6G Nanocomposite as Turn-on Fluorescence Probe for Selective Detection of DNA

Xue Wang, Yu He\*, Gongwu Song

*Ministry-of-Education Key Laboratory for the Synthesis and Application of Organic Functional Molecules, College of Chemistry and Chemical Engineering, Hubei University, Wuhan 430062, China*

\*Corresponding author (email: [heyu@hubei.edu.cn](mailto:heyu@hubei.edu.cn) & [heyutougao@yahoo.com.cn](mailto:heyutougao@yahoo.com.cn))

### EXPERIMENTAL SECTION

**Materials and Reagents.** All reagents used were of analytical grade. Graphite power, Doxyribonucleic acid (DNA), Ribonucleic acid (RNA), Na<sub>2</sub>CO<sub>3</sub>, KMnO<sub>4</sub> and Rhodamine 6G were purchased from Asbury Carbons Ltd. (Shanghai, China), Biosharp, Bo'ao Biotechnology Co., Ltd. (Shanghai, China), Bodi Chemical Holding Co., Ltd (Tianjin, China), Jiaozuo Chemical Plant (Henan, China) and Merck, respectively.

**Synthesis of Graphene Oxide.** GO was synthesized from graphite via a modified Hummers and Offeman's method<sup>[4]</sup>. 1 g of graphite flakes, 0.5 g of NaNO<sub>3</sub> was taken in 250 mL round bottom flask and 23 mL of conc. H<sub>2</sub>SO<sub>4</sub> was added to it. Then 3 g of KMnO<sub>4</sub> was added slowly to the mixture at ice bath, to avoid rapid heat evaluation. After 2 hours the reaction mixture was allowed to stir at 35 °C for 30 minutes. Finally, the reaction mixture was added to 50 mL of water and allowed to stir at 98 °C for 30 minutes, which resulted change of color from yellow to brown. Then 85 mL of water allowed to stir, and the reaction was ended by the addition of 4 mL of 30% H<sub>2</sub>O<sub>2</sub>. The warm solution was then filtered and washed with 5% HCl and then with water. The dry product was dissolved in water sonicated to exfoliate oxidised graphene.

**Synthesis of the complex R6G<sup>+</sup>GO<sup>-</sup>.** 100 mg of GO was dissolved in 30 mL of DI water by sonicator (100 Hz), then 10 mL of 2% Na<sub>2</sub>CO<sub>3</sub> was added to it. The mixture was well stirred and sonicated for a while. Excess Na<sub>2</sub>CO<sub>3</sub> was removed by

dialysis till pH is 7-8. Then 30 mL of Rhodamine 6G ( $3 \times 10^{-3}$  M) aqueous solution was added the above  $\text{Na}^+\text{GO}^-$  sediment. Resulting mixture was sonicated at 15-20 °C for 3 hrs, excess dye was removed by dialyzing with DI water for several days. The resultant product was dried for further use.

**Apparatus.** The crystalline structure and composition of the GO were identified respectively by a D/max-III C X-ray diffractometer (Shimadzu, Japan). Fourier Transform Infra-Red (FTIR) spectra were taken with a Spectrum One FTIR spectrophotometer (Perkin-Elmer, America) at room temperature. Atomic force microscopy images were collected in the tapping mode using Nanoscope Nanoscope IIIa. The UV-vis absorption measurements were performed on ZF-I Three-operating UV analyzer (Gucun Electricity Light Instrumental Factory, China). The fluorescence measurements were carried out by RF-540 fluorophotometer (Tokyo, Japan). AWH-2 vortex mixer (Huxi Instrumental Co., China) was used to blend the solution. A pHB-4 pH meter (Ruosull Technology Co., China) was used to measure the pH.

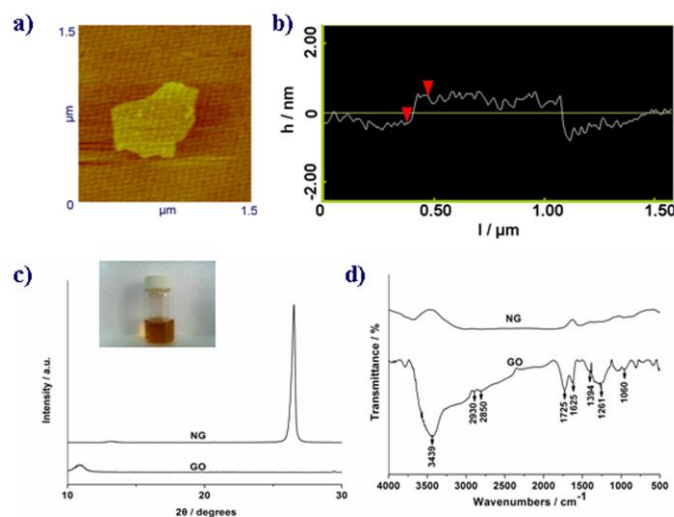

Figure S1 Characterization of GO. a) AFM image and b) height profile of GO. c) XRD and d) IR spectra of GO and natural graphite.

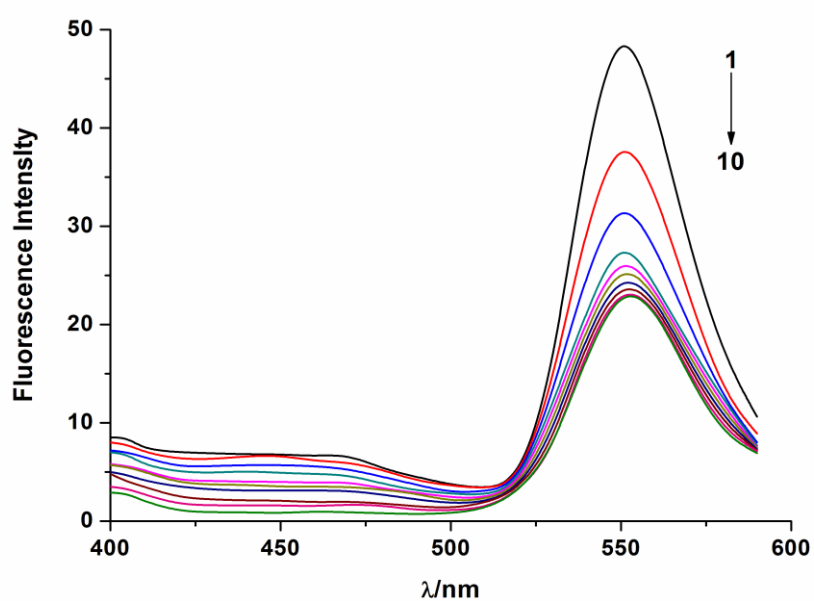

Figure S2. Fluorescence spectra of R6G-DNA system.  $C_{\text{R6G}} = 20 \mu\text{M}$ ,  $C_{\text{DNA}} = 0\text{--}90\text{nM}$ .

Table S1. Binding constant K and the number of binding sites n for R6G-DNA

| Temperature/°C | lgK     | n       | R       | K(L/mol)           |
|----------------|---------|---------|---------|--------------------|
| 31             | 4.38344 | 0.60591 | 0.97781 | $2.42 \times 10^4$ |
| 41             | 4.66355 | 0.63134 | 0.98377 | $4.61 \times 10^4$ |

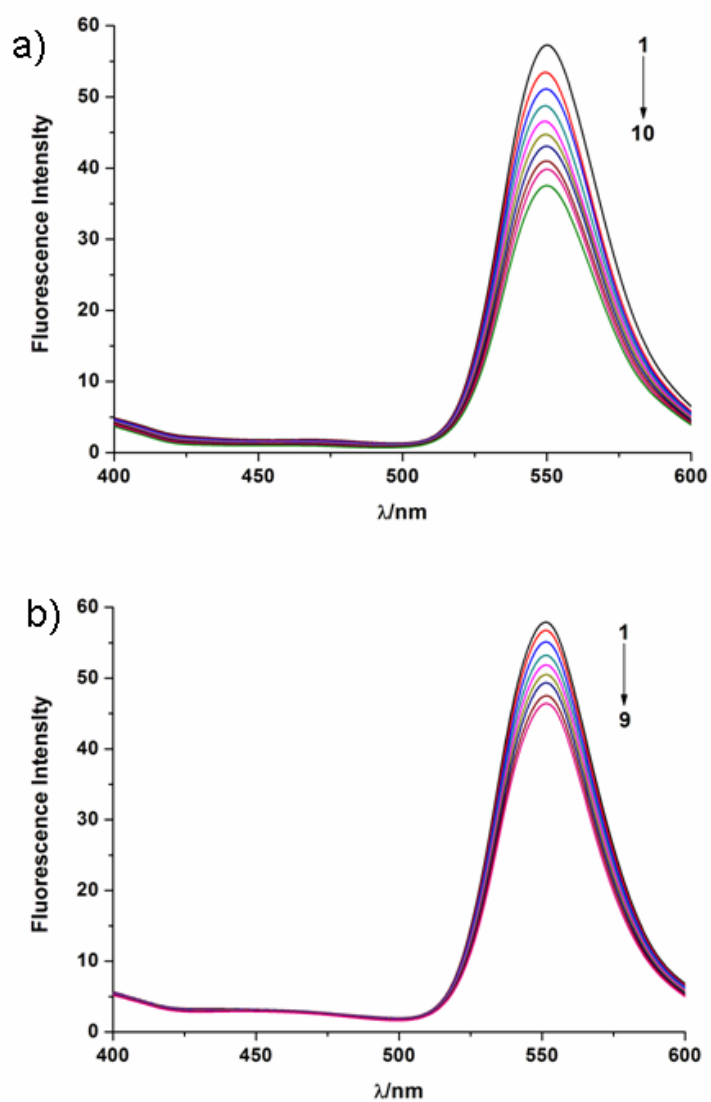

Figure S3. a) Fluorescence quenching of R6G with KI. b) Fluorescence quenching of R6G-DNA with KI.  $C_{\text{R6G}} = 20 \mu\text{M}$ ,  $C_{\text{DNA}} = 30 \text{ nM}$ ,  $C_{\text{KI}} = 0\text{--}800 \mu\text{M}$ .

Table S2. Quenching efficiency of R6G with KI

| KI( $\mu$ L) | $F_0$ | Quenching efficiency of           |      |                                                           |
|--------------|-------|-----------------------------------|------|-----------------------------------------------------------|
|              |       | R6G with KI in the absence of DNA | F    | Quenching efficiency of R6G with KI in the present of DNA |
| 0            | 61.3  |                                   | 61.7 |                                                           |
| 100          | 57.1  | 6.85155                           | 60.6 | 1.78282                                                   |
| 200          | 54.3  | 11.41925                          | 58.8 | 4.700162                                                  |
| 300          | 52    | 15.17129                          | 56.6 | 8.265802                                                  |
| 400          | 49.8  | 18.7602                           | 55.2 | 10.53485                                                  |
| 500          | 47.7  | 22.18597                          | 53.8 | 12.80389                                                  |
| 600          | 45.9  | 25.12235                          | 52.7 | 14.58671                                                  |
| 700          | 43.8  | 28.54812                          | 50.6 | 17.99028                                                  |
| 800          | 42.8  | 30.17945                          | 49.6 | 19.61102                                                  |
